# Supplementary material for: Magnetic field-governed kinetics in a silicon dioxide-based anode towards high performing lithium-ion magneto-batteries
Source: Royal Society of Chemistry journal article supplement (doi:10.1039/d4ta03612c), 2024-01-01
Supplement: d4ta03612c1.pdf [file d4ta03612c1.pdf]

## Supplementary Materials

### **Magnetic field-governed kinetics in silicon dioxide-based anode towards high performing lithium-ion magneto-batteries**

Rizwan Ur Rehman Sagar <sup>a</sup>, Srikanth Mateti <sup>a</sup>, Nasir Mahmood <sup>b</sup>, Muhammad Waqas Khan <sup>b</sup>,  
Ying (Ian) Chen <sup>a\*</sup>, Md Mokhlesur Rahman <sup>a\*</sup>

<sup>a</sup>Institute for Frontier Materials, Deakin University, Waurin Ponds, VIC, 3216, Australia

<sup>b</sup>School of Engineering, RMIT University, Melbourne, VIC 3001, Australia

#### **Corresponding authors:**

E-mail addresses: MokhlesDeakin@gmail.com (M.M. Rahman); ian.chen@deakin.edu.au (Y. Chen)

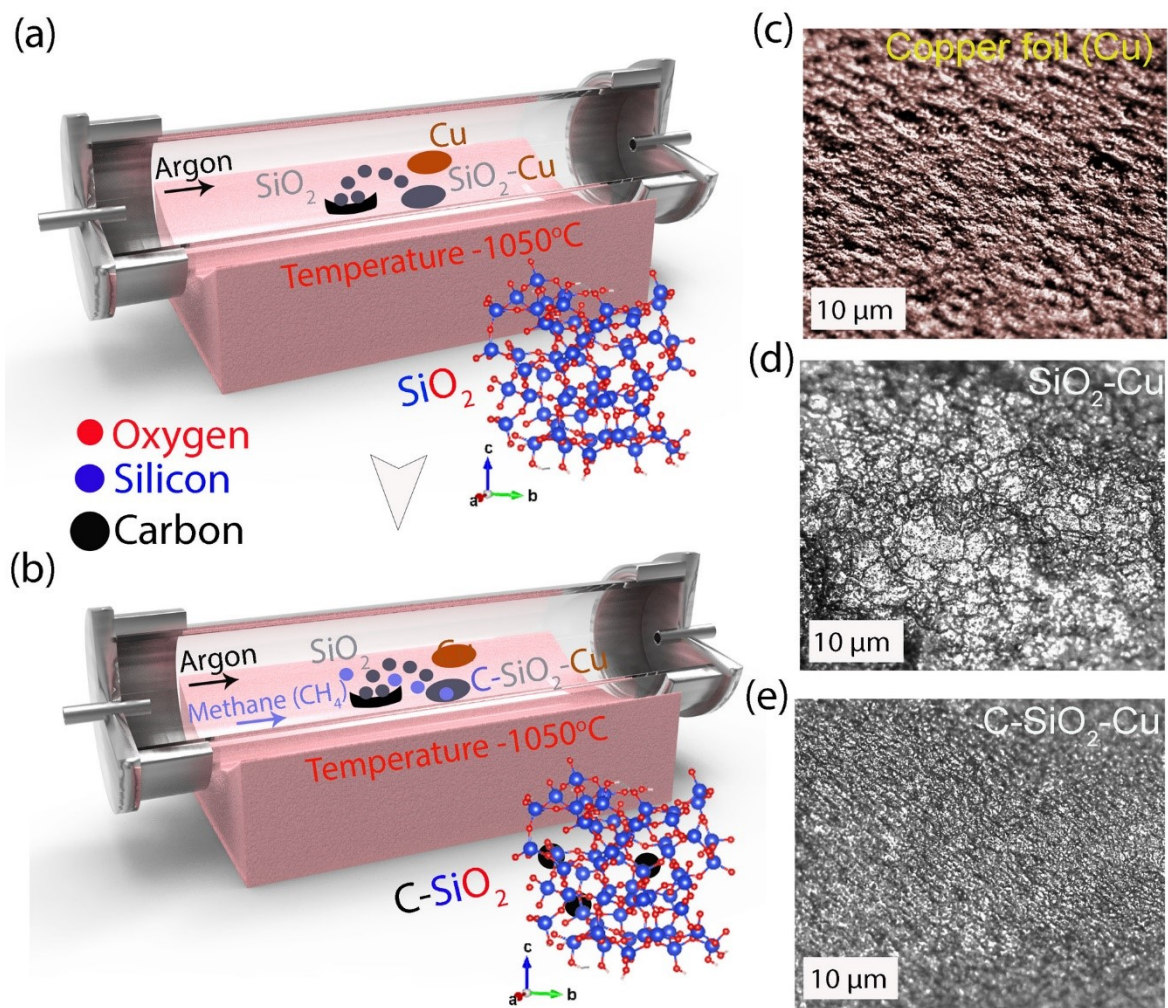

**Fig. S1.** Schematic presentation of the deposition of SiO<sub>2</sub> and carbon on the surface of Cu foil using CVD technique: (a) direct deposition of SiO<sub>2</sub> on the surface of copper (SiO<sub>2</sub>/Cu sample) and (b) direct deposition of SiO<sub>2</sub> and carbon (CH<sub>4</sub> is used as a source of carbon) on the surface of copper (C-SiO<sub>2</sub>/Cu sample). (c-e) surface analysis by optical microscope: (c) Cu-foil surface, (d) surface of SiO<sub>2</sub> particles deposited on Cu foil (SiO<sub>2</sub> shows shiny surface), and (e) carbon incorporated SiO<sub>2</sub> particles deposited on Cu foil (reduces the shiny surface and trends to darker due to carbon deposition).

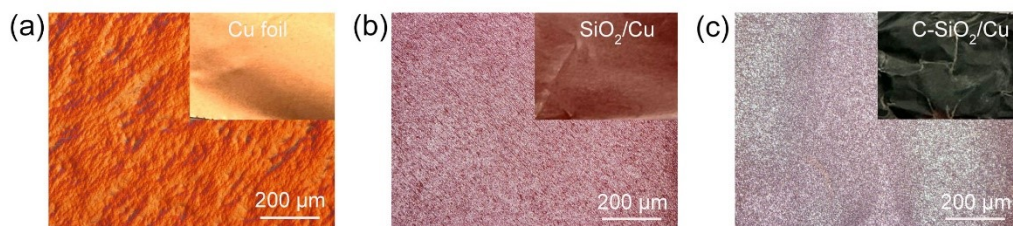

**Fig. S2.** (a-c) Optical microscopy images: (a) Cu-foil surface (inset digital image), (b) surface of SiO<sub>2</sub> particles deposited on Cu foil (inset digital image), and (c) carbon incorporated SiO<sub>2</sub> particles deposited on Cu foil (inset digital image). A significant surface color changes after deposition of SiO<sub>2</sub> and carbon.

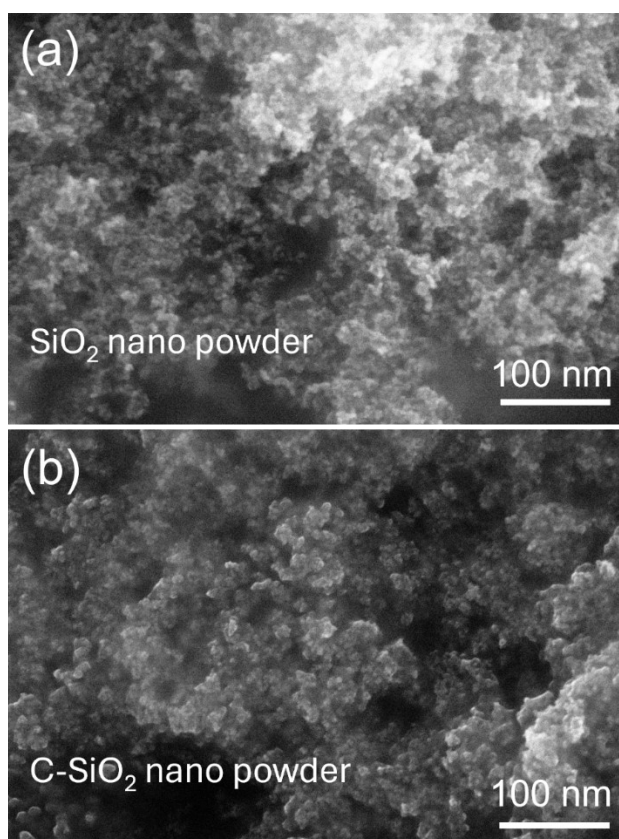

**Fig. S3.** SEM images of the SiO<sub>2</sub> and C-SiO<sub>2</sub> nano powders before deposition on the copper surface.

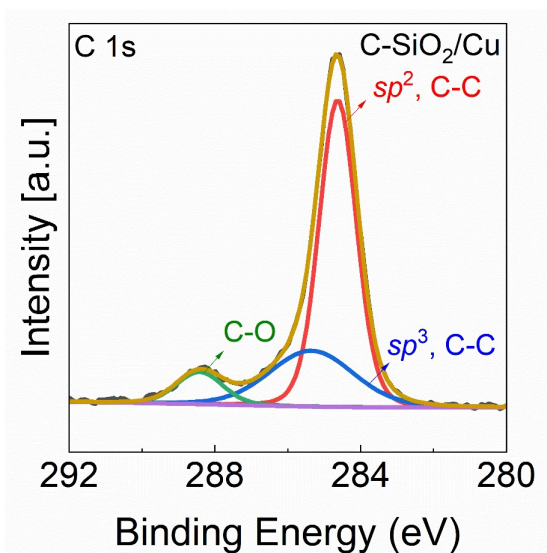

**Fig. S4.** C 1s spectra of the C-SiO<sub>2</sub>/Cu sample.

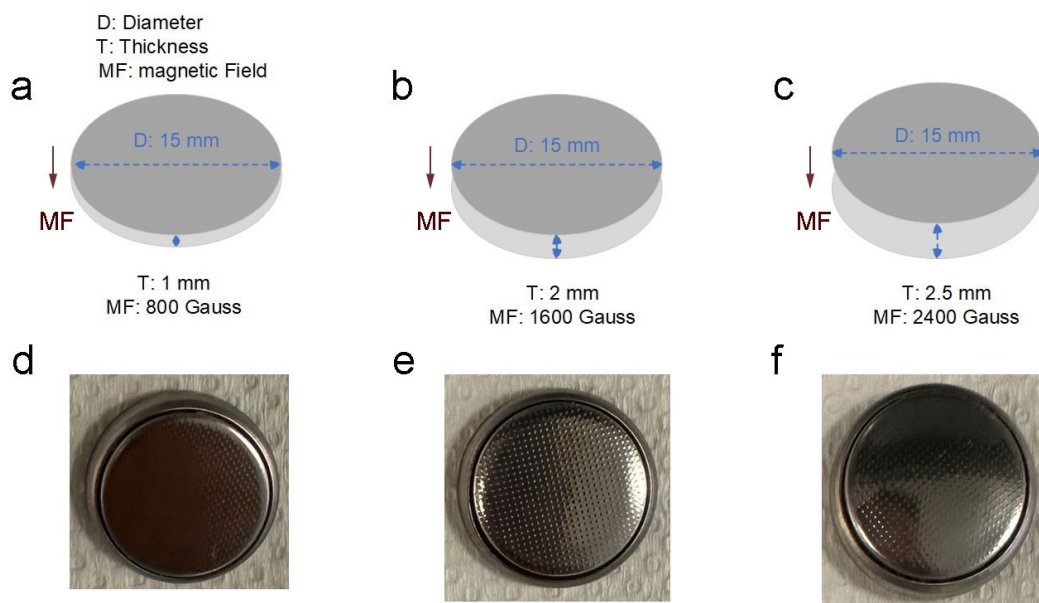

**Fig. S5.** Different magnetic spacers: (a) 15 × 1 mm- 800 Gauss, (b) 15 × 2 mm- 1600 Gauss and (c) 15 × 2.5 mm- 2400 Gauss used to assemble CR-2032-coin cells (d, e, f), respectively.

**Table S1.** Comparison of the battery performance of the SiO<sub>x</sub> based materials with present results.

| Materials                                                 | Initial discharge -charge capacity | Initial Coulombic efficiency | Cycling performance                                                 | Rate performance                                  | Ref.      |
|-----------------------------------------------------------|------------------------------------|------------------------------|---------------------------------------------------------------------|---------------------------------------------------|-----------|
| SiO <sub>x</sub> -graphene/C                              | 896/607 mAh g <sup>-1</sup>        | 67.7 %                       | 630 mAh g <sup>-1</sup> at 100 mA g <sup>-1</sup> after 250 cycles  | 408 mAh g <sup>-1</sup> at 600 mA g <sup>-1</sup> | [44]      |
| SiO <sub>x</sub> /C                                       | 1475/1015 mAh g <sup>-1</sup>      | 68.8 %                       | 817 mAh g <sup>-1</sup> at 100 mA g <sup>-1</sup> after 100 cycles  | 650 mAh g <sup>-1</sup> at 800 mA g <sup>-1</sup> | [45]      |
| SiO <sub>x</sub> /C                                       | 1324/906 mAh g <sup>-1</sup>       | 68.4 %                       | 720 mAh g <sup>-1</sup> at 100 mA g <sup>-1</sup> after 350 cycles  | 410 mAh g <sup>-1</sup> at 800 mA g <sup>-1</sup> | [46]      |
| SiO <sub>x</sub> /MWCNT/C                                 | 1093/720 mAh g <sup>-1</sup>       | 66 %                         | 620 mAh g <sup>-1</sup> at 100 mA g <sup>-1</sup> after 450 cycles  | 388 mAh g <sup>-1</sup> at 800 mA g <sup>-1</sup> | [47]      |
| SiO <sub>2</sub> /C                                       | 880/530 mAh g <sup>-1</sup>        | 68 %                         | 441 mAh g <sup>-1</sup> at 500 mA g <sup>-1</sup> after 500 cycles  | 231 mAh g <sup>-1</sup> at 2A g <sup>-1</sup>     | [48]      |
| SiO <sub>x</sub> /Graphite                                | 785/645 mAh g <sup>-1</sup>        | 82.2 %                       | 580 mAh g <sup>-1</sup> at 325 mA g <sup>-1</sup> after 500 cycles  | 549 mAh g <sup>-1</sup> at 3A g <sup>-1</sup>     | [49]      |
| Carbon coating lemon-like SiO <sub>2</sub> hollow spheres | 451/203 mAh g <sup>-1</sup>        | < 50 %                       | 786 mAh g <sup>-1</sup> at 1 Ag <sup>-1</sup> after 500 cycles      | 681 mAh g <sup>-1</sup> at 2A g <sup>-1</sup>     | [50]      |
| Nanotubular SiO <sub>2</sub> @C composite                 | -                                  | 50.5 %                       | 526 mAh g <sup>-1</sup> at 1 A g <sup>-1</sup> after 500 cycles     | ~ 600 mAh g <sup>-1</sup> at 2A g <sup>-1</sup>   | [51]      |
| Rice Husk-Derived SiO <sub>2</sub> /C Composites          | -                                  | 60 %                         | 730 mAh g <sup>-1</sup> at 100 mA g <sup>-1</sup> after 100 cycles  | 480 mAh g <sup>-1</sup> at 1A g <sup>-1</sup>     | [52]      |
| 3D PAA-TA/SiO <sub>x</sub>                                | 2328/1550                          | 66.7%.                       | 1025 mAh g <sup>-1</sup> at 500 mA g <sup>-1</sup> after 250cycles  | 670 mAh g <sup>-1</sup> at 2A g <sup>-1</sup>     | [53]      |
| Porous carbon rich SiO <sub>x</sub> /C                    | 718/650                            | 90%                          | 533 at 200 mA g <sup>-1</sup> 200 cycles                            | 299 mAh g <sup>-1</sup> at 1A g <sup>-1</sup>     | [54]      |
| SiO <sub>x</sub> /G/C anode                               | 790/660                            | 83%                          | 487 mAh g <sup>-1</sup> at 300 mA g <sup>-1</sup> after 500 cycles  | 650 mAh g <sup>-1</sup> at 1.2 A g <sup>-1</sup>  | [55]      |
| Carbon coated C-SiO <sub>2</sub> (under magnetic field)   | 1757/1686                          | 96%                          | 2020 mAh g <sup>-1</sup> at 100 mA g <sup>-1</sup> after 750 cycles | 891 mAh g <sup>-1</sup> at 2A g <sup>-1</sup> .   | This Work |

## References

44. M. Li, Y. Yu, J. Li, B. Chen, A. Konarov and P. Chen, *Journal of Power Sources*, 2015, **293**, 976-982.

45. P. Lv, H. Zhao, C. Gao, T. Zhang and X. Liu, *Electrochimica Acta*, 2015, **152**, 345-351.
46. Y. Ren and M. Li, *Journal of Power Sources*, 2016, **306**, 459-466.
47. Y. Ren, X. Wu and M. Li, *Electrochimica Acta*, 2016, **206**, 328-336.
48. W. An, J. Fu, J. Su, L. Wang, X. Peng, K. Wu, Q. Chen, Y. Bi, B. Gao and X. Zhang, *Journal of Power Sources*, 2017, **345**, 227-236.
49. Q. Xu, J.-K. Sun, Y.-X. Yin and Y.-G. Guo, *Advanced Functional Materials*, 2018, **28**, 1705235.
50. K. Chen, Y. Tan, K. Wang, J. Niu and Z. Y. Chen, *Electrochimica Acta*, 2022, **401**, 139497.
51. C. Shi, J. Chen, T. Guo, G. Luo, H. Shi, Z. Shi, G. Qin, L. Zhang and X. He, *Batteries*, 2023, **9**, 107.
52. X. Cui, L. Liu, X. Liu, Y. Li, Y. Feng, L. Ma, L. Liu, Y. Xue, Y. Zhu and X. Wang, *Journal of Electronic Materials*, 2022, **51**, 68-76.
53. W. Tang, L. Feng, X. Wei, G. Lai, H. Chen, Z. Li, X. Huang, S. Wu and Z. Lin, *ACS Applied Materials & Interfaces*, 2022, **14**, 56910-56918.
54. Q. Aini, Y. Irmawati, J. Karunawan, M. H. R. Pasha, A. Alni, F. Iskandar and A. Sumboja, *Energy & Fuels*, 2023, **37**, 11397-11405.
55. G. Li, J.-Y. Li, F.-S. Yue, Q. Xu, T.-T. Zuo, Y.-X. Yin and Y.-G. Guo, *Nano Energy*, 2019, **60**, 485-492.
